# Supplementary material
Source: MDPI journal article supplement (https://www.mdpi.com/2073-4352/13/5/790)
Supplement: s1 [file s1 › crystals-2351904-supplementary.pdf]

# **Microwave dielectric properties of $\text{CaB}_2\text{O}_4$ - $\text{CaSiO}_3$ eutectic system for LTCC applications**

Changzhi Yin<sup>a,b</sup>, Zhengyu Zou<sup>c</sup>, mingfei Cheng<sup>a,b</sup>, Yiyang Cai<sup>a,b</sup>, Jiaqing Yang<sup>a,b</sup>,  
Weicheng Lei<sup>a,b</sup>, Wenzhong Lu<sup>a,b</sup>, Xiaoqiang Song<sup>a,b\*</sup>, Wen Lei<sup>a,b\*</sup>

<sup>a</sup>*Wenzhou Advanced Manufacturing Institute, Huazhong University of Science and Technology, Wenzhou, 325035, China*

<sup>b</sup>*School of Optical and Electronic Information, Key Lab of Functional Materials for Electronic Information (B) of MOE, Huazhong University of Science and Technology, Wuhan 430074, China*

<sup>c</sup>*Aerospace Nanhu Electronic Information Technology Co., Ltd, Wuhan 430074, China*

---

\* Authors to whom correspondence should be addressed: SongXQ@mail.hust.edu.cn, wenlei@mail.hust.edu.cn

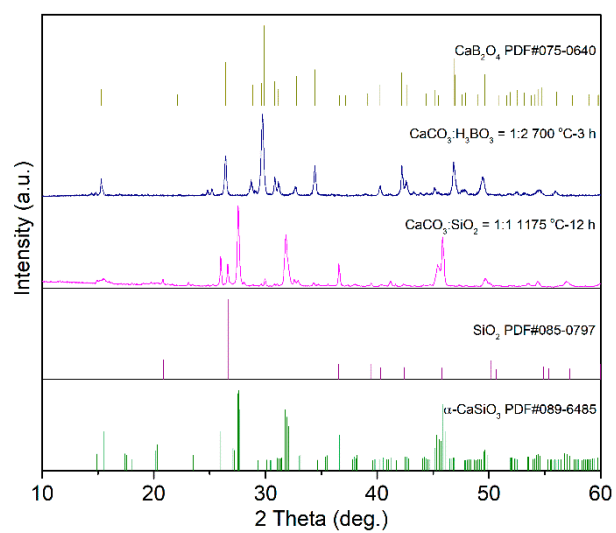

Figure S1 the XRD patterns of calcined at different temperature of  $\text{CaB}_2\text{O}_4$  and  $\text{CaSiO}_3$

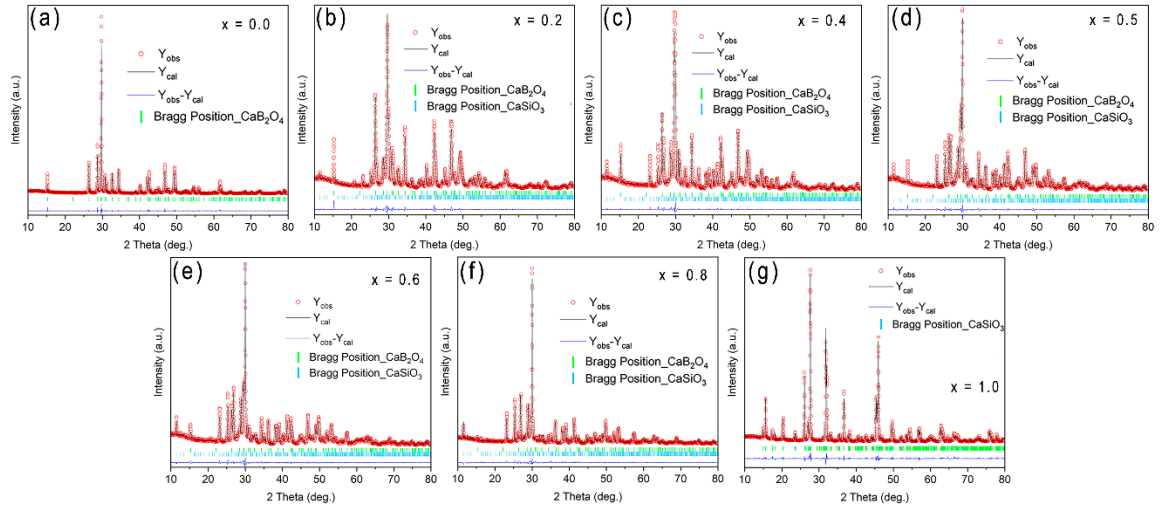

Figure S2 The Rietveld refinement results of  $(1-x)\text{CaB}_2\text{O}_4 + x\text{CaSiO}_3$

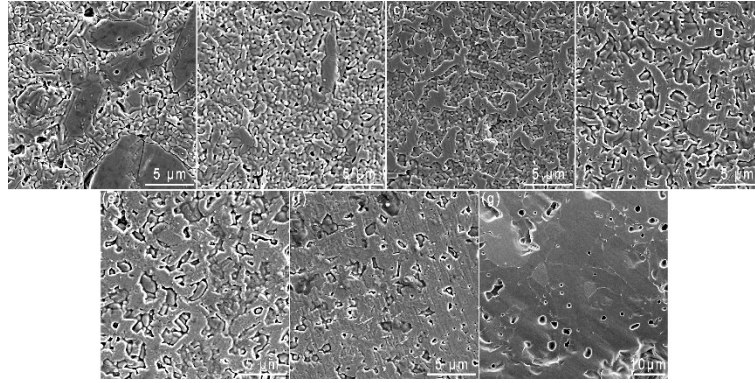

Figure S3 The microstructure of  $(1-x)\text{CaB}_2\text{O}_4+x\text{CaSiO}_3$  ceramics sintered at their optimum temperature: (a)  $x = 0.1$ , (b)  $x = 0.2$ , (c)  $x = 0.4$ , (d)  $x = 0.5$ , (e)  $x = 0.6$ , (f)  $x = 0.8$ , (g)  $x = 1$
